# Supplementary figures and images for: Characterization of Spindle Checkpoint Kinase Mps1 Reveals Domain with Functional and Structural Similarities to Tetratricopeptide Repeat Motifs of Bub1 and BubR1 Checkpoint Kinases
Source: PubMed Central journal article supplement — J Biol Chem. 2011 Dec 20;287(8):5988–6001. doi: 10.1074/jbc.M111.307355 (PMC3285366; doi:10.1074/jbc.m111.307355), 2011-12-20

Fig. S1

Buffer

Mps1

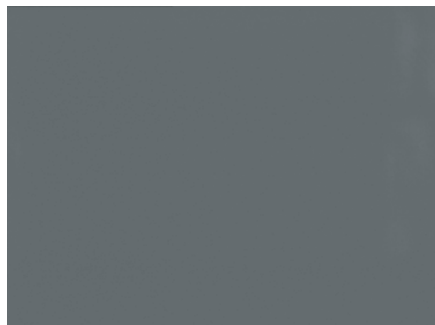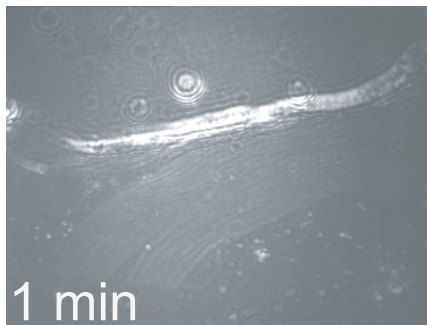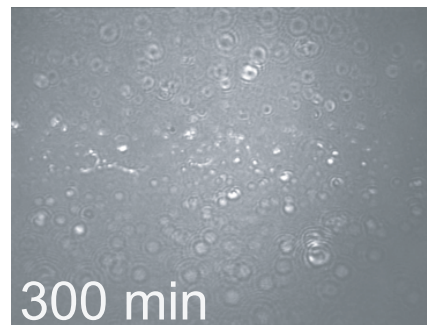

Bub1

BubR1

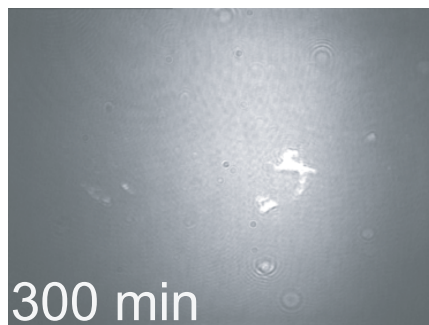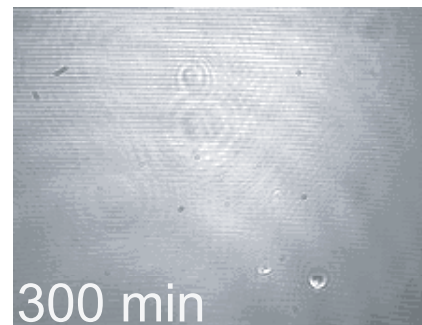

Supplement: supp_M111.307355_jbc.M111.307355-1.pdf [file supp_M111.307355_jbc.M111.307355-1.pdf]

Fig. S2

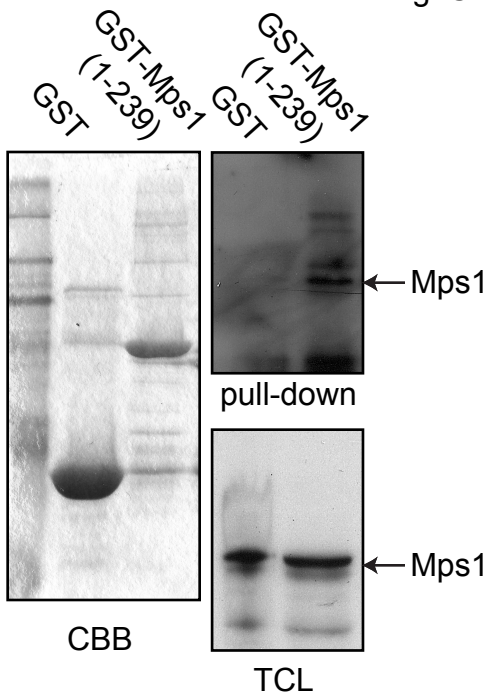

Supplement: supp_M111.307355_jbc.M111.307355-2.pdf [file supp_M111.307355_jbc.M111.307355-2.pdf]
